# Supplementary material for: Comparison of Two Magnesium Sulfate Protocols in Opioid-Free Anesthesia for Bariatric Surgery
Source: Research Square preprint supplement (doi:10.21203/rs.3.rs-8632966/v1), 2026-01-28
Supplement: Supplementary file 1 [file 944e3e67bce91a437affd863.docx]

|  | **Group A** | | | **Group B** | | |
| --- | --- | --- | --- | --- | --- | --- |
| **Variable** | **Mean** | **SD** | **Mean 95% CI** | **Mean** | **SD** | **Mean 95% CI** |
| *Age* | 40.3 | 11.8 | 37.1-43.5 | 45.5 | 12.8 | 42-48.9 |
| *Weight* | 118 | 26.7 | 111-126 | 118 | 22.2 | 112-124 |
| *Height (cm)* | 167 | 8.6 | 165-170 | 165 | 7.8 | 163-167 |
| *ATBW* | 87.8 | 14.5 | 83.9-91.7 | 86.3 | 12 | 83.1-89.6 |
| *BMI* | 41.9 | 7.26 | 40-43.9 | 43.1 | 6.78 | 41.3-45 |
