# Supplementary material for: Comparison of Two Magnesium Sulfate Protocols in Opioid-Free Anesthesia for Bariatric Surgery
Source: Research Square preprint supplement (doi:10.21203/rs.3.rs-8632966/v1), 2026-01-28
Supplement: Supplementary file 2 [file e36605ab38e8db20a96554e7.docx]

| **Null Hypothesis** | **Variable** | **Statistic** | **DF** | **P-value** |
| --- | --- | --- | --- | --- |
| µA - µB = 0 | VAS after 1 Hr | t = -0.18 | 108 | 0.86 |
| VAS after 2 Hr | t = 2.92 | 108 | **<0.05** |
| VAS after 4 Hr | t = 4.71 | 92 | **<0.05** |
| VAS after 24 Hr | t = 4.47 | 108 | **<0.05** |
| VAS after 48 Hr | t = 3.87 | 108 | **<0.05** |
| Time from Infusion Stopping to Awakening (min) | t = 6.09 | 104.6 | **<0.05** |
| Total Postoperative Morphine (mg) | t = 2.15 | 101 | **<0.05** |
