# Supplementary material for: Comparison of Two Magnesium Sulfate Protocols in Opioid-Free Anesthesia for Bariatric Surgery
Source: Research Square preprint supplement (doi:10.21203/rs.3.rs-8632966/v1), 2026-01-28
Supplement: Supplementary file 3 [file f6aa0c94856bb3c82d79889e.docx]

| **Null Hypothesis** | **Contrsat** | **Statistic** | **DF** | **P-value** |
| --- | --- | --- | --- | --- |
| Homogeneity between groups | Sex vs. Group | ꭕ2 = 1.617 | 1 | 0.2 |
| Surgical Intervention vs. Group | ꭕ2 = 10.98 | 3 | 0.38 |
| Adverse Effects at 1Hr vs. Group | ꭕ2 = 1.62 | 2 | 0.57 |
| Multivariate µA - µB = 0 | Hotelling T2 test | T2 = 1.558 | 5; 104 | 0.06 |
